# Supplementary material for: The Contribution of GWAS Loci in Familial Dyslipidemias
Source: PubMed Central journal article supplement (PMC4882070; doi:10.1371/journal.pgen.1006078), 2016-05-26

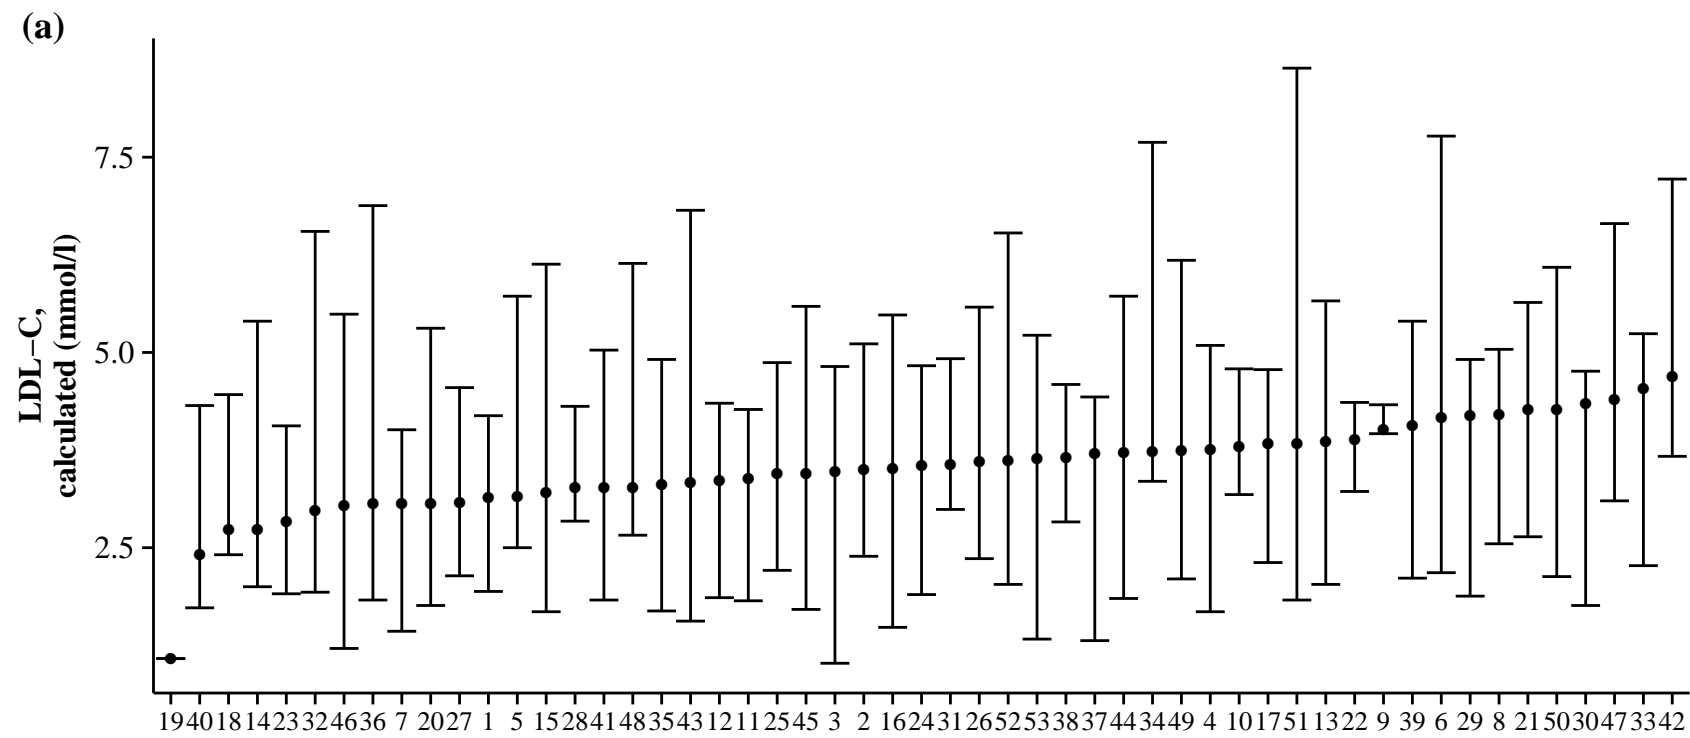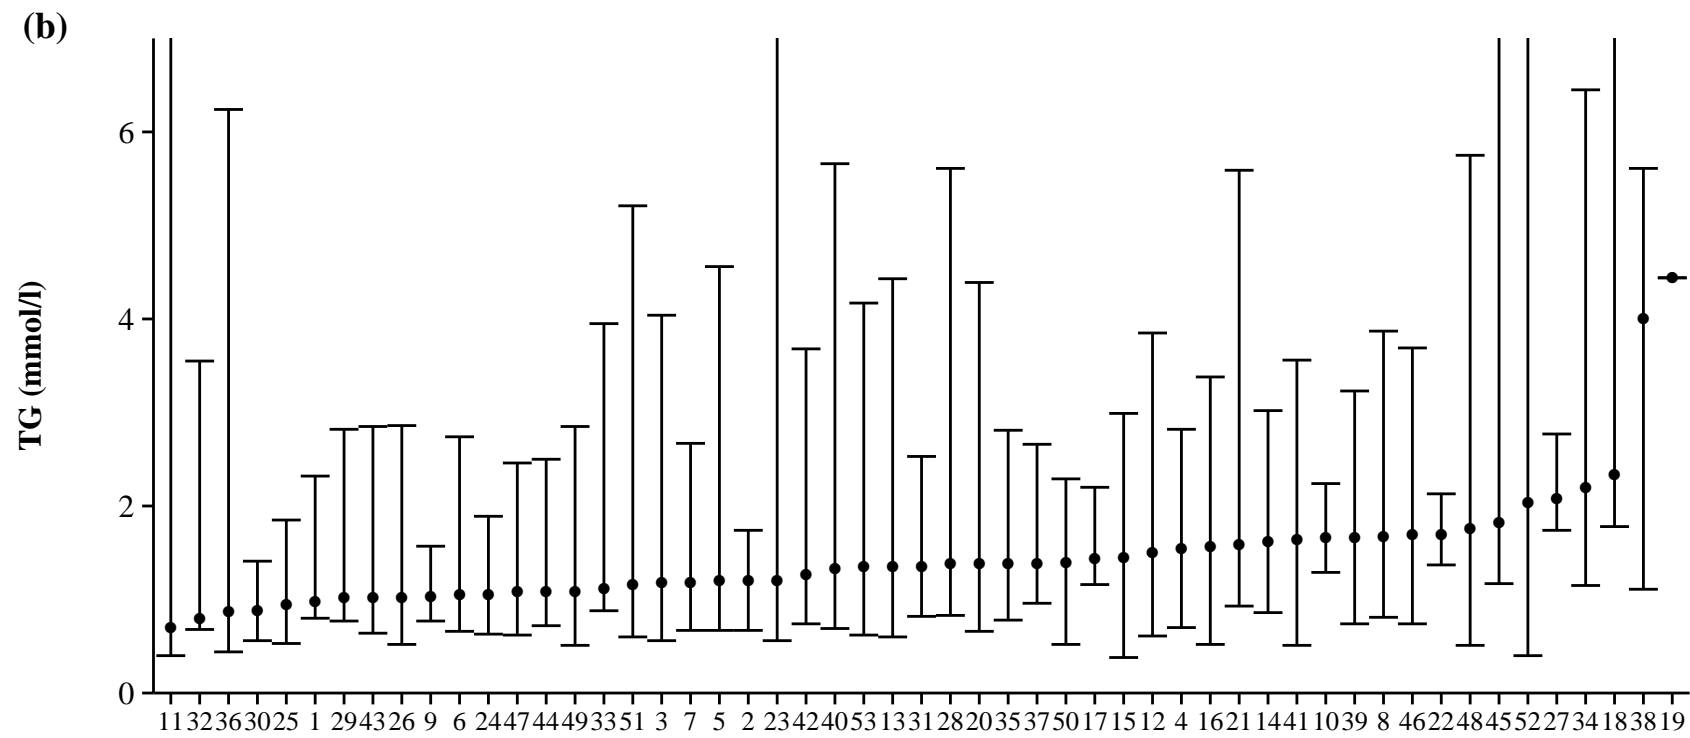

Supplement: pgen.1006078.s003.pdf [file pgen.1006078.s003.pdf]
