# Supplementary material for: The Contribution of GWAS Loci in Familial Dyslipidemias
Source: PubMed Central journal article supplement (PMC4882070; doi:10.1371/journal.pgen.1006078), 2016-05-26

(a) All score variants in family probands (n=48)

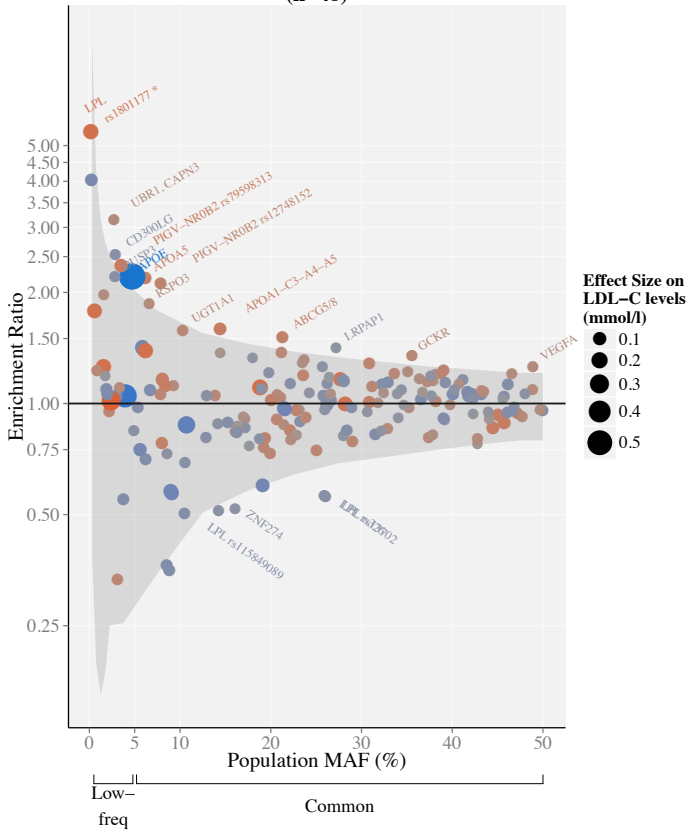

(b) All score variants in family probands (n=48)

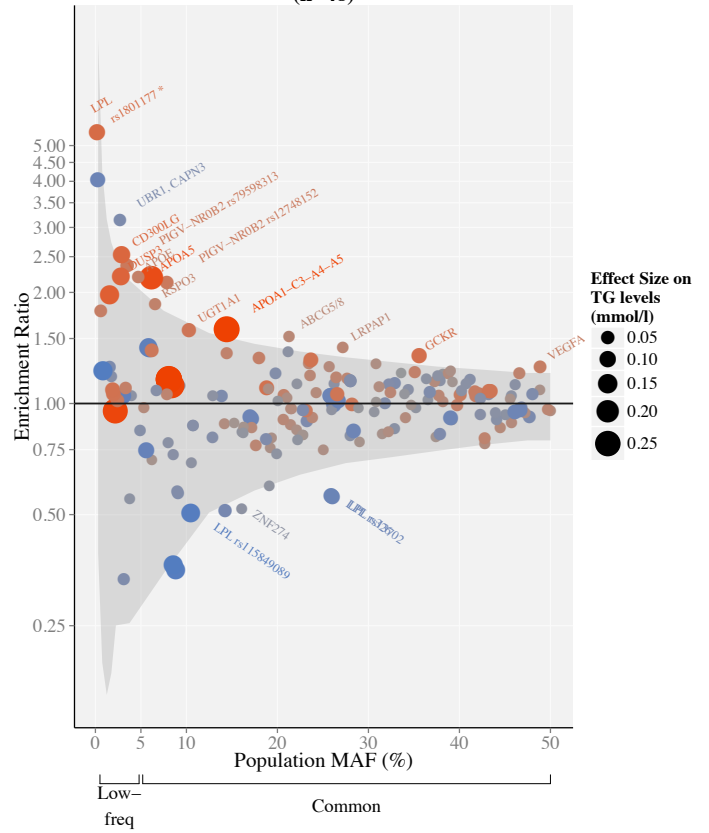

(c) All score variants in all FCH family members (n=715)

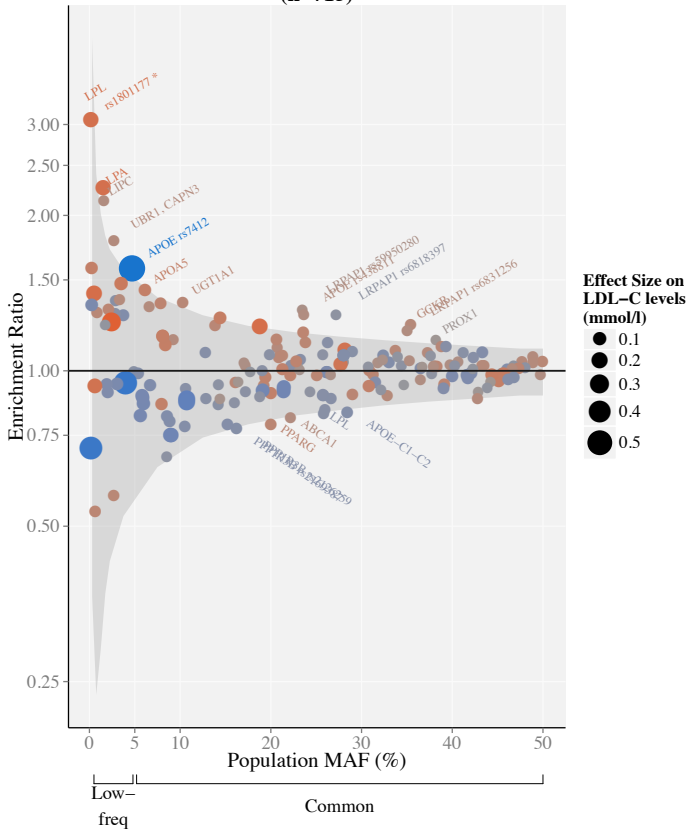

(d) All score variants in all FCH family members (n=715)

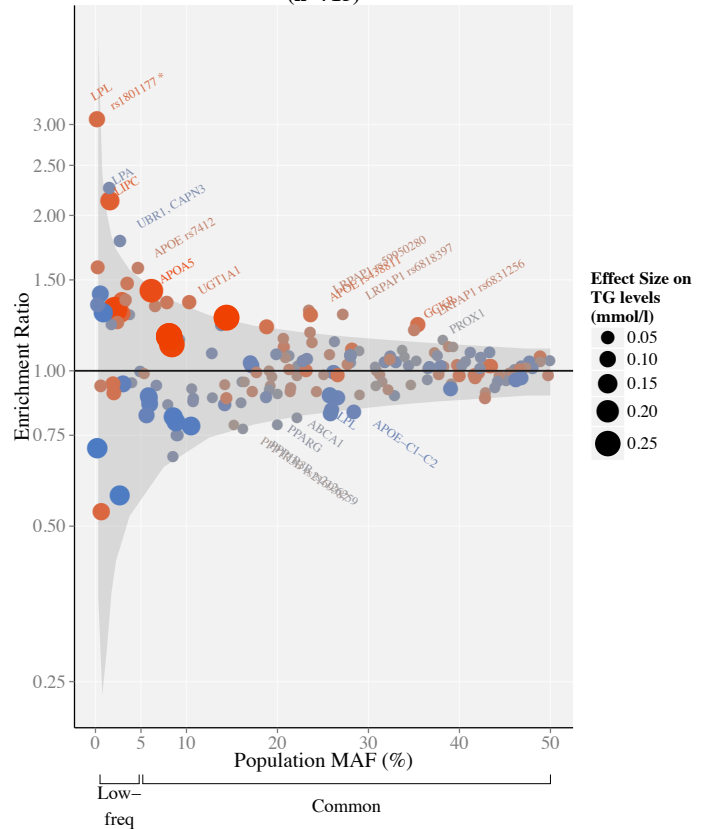

Supplement: pgen.1006078.s004.pdf [file pgen.1006078.s004.pdf]
