# Supplementary material for: The Contribution of GWAS Loci in Familial Dyslipidemias
Source: PubMed Central journal article supplement (PMC4882070; doi:10.1371/journal.pgen.1006078), 2016-05-26
Supplement: pgen.1006078.s007.pdf [file pgen.1006078.s007.pdf]

|                            | FCH affected  |           | FCH unaffected |           | <i>p</i> -value        |
|----------------------------|---------------|-----------|----------------|-----------|------------------------|
|                            | <i>n</i>      | Mean ± SD | <i>n</i>       | Mean ± SD |                        |
| <i>n</i> (male/female)     | 258 (115/143) |           | 907 (488/415)  |           | $7.08 \times 10^{-3}$  |
| Smoking, <i>n</i> (%)      | 77 (30)       |           | 138 (15)       |           | 0.53                   |
| Age (year)                 | 257           | 42.6±14.2 | 739            | 43.5±17.6 | 0.47                   |
| BMI (kg/m <sup>2</sup> )   | 232           | 27.3±4.9  | 475            | 25.2±4.6  | $1.04 \times 10^{-6}$  |
| Waist circumference (cm)   | 186           | 92±14     | 343            | 86±14     | $1.58 \times 10^{-6}$  |
| Total cholesterol (mmol/l) | 235           | 6.62±1.38 | 480            | 5.22±0.91 | $2.53 \times 10^{-58}$ |
| LDL-C (mmol/l)             | 235           | 4.26±1.24 | 480            | 3.33±0.89 | $1.86 \times 10^{-29}$ |
| Triglyceride (mmol/l)      | 235           | 2.55±2.05 | 480            | 1.13±0.50 | $4.43 \times 10^{-46}$ |
| HDL-C (mmol/l)             | 231           | 1.23±0.40 | 471            | 1.40±0.42 | $7.24 \times 10^{-7}$  |
| Apolipoprotein B (mg/dl)   | 214           | 125±32    | 450            | 88±22     | $1.21 \times 10^{-68}$ |
| Non-HDL-C (mmol/l)         | 231           | 5.40±1.42 | 471            | 3.81±0.95 | $1.13 \times 10^{-67}$ |
