# Supplementary material for: The Contribution of GWAS Loci in Familial Dyslipidemias
Source: PubMed Central journal article supplement (PMC4882070; doi:10.1371/journal.pgen.1006078), 2016-05-26
Supplement: pgen.1006078.s009.pdf [file pgen.1006078.s009.pdf]

Effect Allele Frequency

|             | Gene           | Effect allele | Source | Effect on LDL-C | Effect on TG | NFE† (%) | FINRISK‡ (%) | FCH Affected (%) | Enrichment Ratio§ | P-value in affected individuals | P-value in probands | Heterozygotes (Affected) | Homozygotes (Affected) |
|-------------|----------------|---------------|--------|-----------------|--------------|----------|--------------|------------------|-------------------|---------------------------------|---------------------|--------------------------|------------------------|
| rs1260326   | GCKR           | T             | T.M.T. | +               | +            | 41       | 36           | 47               | 1.3               | 0.001                           | 0.0097              | 317 (125)                | 132 (47)               |
| rs12748152  | PIGV-NR0B2     | T             | C.J.W. | +               | +            | 7.5      | 7.9          | 15               | 1.9               | 0.0015                          | 0.0076              | 125 (57)                 | 10 (7)                 |
| rs62020698  | UBR1, CAPN3    | T             | I.S.   | +               | -            | 12       | 2.7          | 6.5              | 2.4               | 0.0017                          | 0.00099             | 52 (24)                  | 1 (1)                  |
| rs79598313  | PIGV-NR0B2     | T             | I.S.   | +               | +            | 2.5      | 3.5          | 8.3              | 2.4               | 0.002                           | 0.026               | 59 (29)                  | 6 (5)                  |
| rs11563251  | UGT1A1         | T             | C.J.W. | +               | +            | 12       | 10           | 16               | 1.6               | 0.0032                          | 0.042               | 129 (54)                 | 13 (6)                 |
| rs116843064 | ANGPTL4        | A             | I.S.   | +               | -            | 5        | 2.7          | 0.43             | 0.16              | 0.0032                          |                     | 21 (2)                   | 0 (0)                  |
| rs964184    | APOA1-C3-A4-A5 | G             | T.M.T. | +               | +            | 16       | 14           | 23               | 1.6               | 0.004                           | 0.04                | 208 (91)                 | 18 (8)                 |
| rs3135506   | APOA5          | C             | J.A.K. | +               | +            | 7.9      | 6.2          | 11               | 1.8               | 0.0041                          | 0.0049              | 105 (43)                 | 6 (5)                  |
| rs72959041  | RSPO3          | A             | I.S.   | +               | +            | 4.8      | 6.6          | 12               | 1.8               | 0.0044                          | 0.034               | 94 (45)                  | 5 (3)                  |
| rs13702     | LPL            | C             | J.A.K. | -               | -            | 34       | 26           | 18               | 0.69              | 0.0044                          | 0.004               | 223 (72)                 | 27 (6)                 |
| rs72836561  | CD300LG        | T             | I.S.   | -               | +            | 2.9      | 2.9          | 6.4              | 2.2               | 0.0048                          | 0.015               | 51 (28)                  | 1 (1)                  |
| rs438811    | APOE           | T             | I.S.   | +               | +            | 21       | 24           | 33               | 1.4               | 0.0051                          | 0.1                 | 296 (110)                | 53 (22)                |
| rs439401    | APOE-C1-C2     | T             | T.M.T. | -               | -            | 40       | 28           | 20               | 0.71              | 0.0067                          | 0.34                | 231 (68)                 | 44 (13)                |
| rs326       | LPL            | G             | J.A.K. | -               | -            | 34       | 26           | 19               | 0.71              | 0.0082                          | 0.0038              | 227 (73)                 | 29 (7)                 |
| rs77697917  | DUSP3          | T             | I.S.   | -               | +            | 4.1      | 2.8          | 5.9              | 2.1               | 0.01                            | 0.045               | 44 (24)                  | 1 (1)                  |
| rs6818397   | LRPAP1         | T             | C.J.W. | -               | +            | 43       | 27           | 35               | 1.3               | 0.013                           | 0.018               | 284 (104)                | 88 (30)                |
| rs28933094  | LIPC           | T             | J.A.K. | +               | +            | 0.33     | 1.6          | 4.1              | 2.6               | 0.015                           | 0.22                | 45 (19)                  | 0 (0)                  |
| rs515135    | APOB           | T             | I.S.   | -               | -            | 19       | 19           | 13               | 0.67              | 0.026                           | 0.06                | 182 (50)                 | 21 (5)                 |
| rs3856806   | PPARG          | T             | J.A.K. | +               | -            | 13       | 20           | 13               | 0.68              | 0.028                           | 0.22                | 155 (53)                 | 26 (5)                 |
| rs998584    | VEGFA          | A             | C.J.W. | +               | +            | 50       | 49           | 57               | 1.2               | 0.03                            | 0.015               | 332 (125)                | 186 (70)               |
| rs2126259   | PPP1R3B        | T             | T.M.T. | -               | -            | 8.4      | 16           | 11               | 0.68              | 0.032                           | 0.46                | 144 (48)                 | 8 (2)                  |
| rs2169387   | PPP1R3B        | A             | I.S.   | -               | +            | 8.3      | 15           | 10               | 0.69              | 0.033                           | 0.62                | 136 (45)                 | 8 (2)                  |
| rs115849089 | LPL            | A             | I.S.   | -               | -            | 15       | 11           | 6.7              | 0.63              | 0.038                           | 0.047               | 95 (29)                  | 4 (1)                  |
| rs59950280  | LRPAP1         | A             | I.S.   | +               | +            | 31       | 23           | 30               | 1.3               | 0.039                           | 0.14                | 270 (92)                 | 65 (24)                |
| rs6831256   | LRPAP1         | G             | C.J.W. | +               | +            | 40       | 35           | 42               | 1.2               | 0.043                           | 0.11                | 327 (113)                | 116 (41)               |

|             |             |   |         |   |   |      |      |     |      |       |       |           |          |
|-------------|-------------|---|---------|---|---|------|------|-----|------|-------|-------|-----------|----------|
| rs1801177   | LPL         | A | J.A.K.  | + | + | 1.5  | 0.19 | 1.1 | 5.6  | 0.05  | 0.22  | 8 (5)     | 0 (0)    |
| rs429358    | APOE        | C | J.A.K.  | + | + | 21   | 19   | 25  | 1.3  | 0.051 | 0.64  | 237 (93)  | 30 (11)  |
| rs10102164  | SOX17       | A | C.J.W.  | + | + | 17   | 24   | 29  | 1.2  | 0.061 | 0.32  | 272 (112) | 48 (13)  |
| rs41279633  | NPC1L1      | T | I.S.    | + | - | 17   | 21   | 26  | 1.2  | 0.062 | 0.054 | 229 (88)  | 34 (17)  |
| rs4420638   | APOE-C1-C2  | G | T.M.T.  | + | + | 18   | 28   | 34  | 1.2  | 0.064 | 0.99  | 279 (114) | 64 (23)  |
|             |             |   | J.A.K., |   |   |      |      |     |      |       |       |           |          |
| rs7412      | APOE        | T | C.J.W.  | - | + | 11   | 4.7  | 8.1 | 1.7  | 0.074 | 0.044 | 96 (34)   | 3 (2)    |
| rs4810479   | PLTP        | C | T.M.T.  | - | + | 28   | 26   | 32  | 1.2  | 0.075 | 0.28  | 280 (113) | 44 (18)  |
| rs182616603 | MTHFD2L     | T | I.S.    | + | + | 0.12 | 2.4  | 4.5 | 1.9  | 0.087 | 0.95  | 27 (15)   | 0 (0)    |
| rs7225700   | OSBPL7      | T | T.M.T.  | - | + | 34   | 32   | 27  | 0.83 | 0.089 | 0.27  | 296 (113) | 48 (6)   |
| rs6120974   | ERGIC3      | C | I.S.    | - | + | 16   | 6.2  | 3.7 | 0.6  | 0.09  | 0.41  | 57 (15)   | 3 (0)    |
| rs7640978   | CMTM6       | T | C.J.W.  | - | - | 12   | 8.6  | 5.1 | 0.6  | 0.092 | 0.45  | 75 (24)   | 0 (0)    |
| rs1883711   | MAFB        | C | I.S.    | + | + | 3.6  | 6.2  | 8.9 | 1.4  | 0.099 | 0.3   | 71 (37)   | 2 (1)    |
| rs11784833  | GRINA,PLEC1 | C | I.S.    | + | + | 40   | 39   | 45  | 1.2  | 0.1   | 0.12  | 328 (114) | 120 (47) |
| rs7206971   | OSBPL7      | G | I.S.    | + | + | 52   | 49   | 55  | 1.1  | 0.1   | 0.41  | 352 (134) | 148 (39) |
| rs11649653  | CTF1        | G | T.M.T.  | - | - | 40   | 42   | 37  | 0.87 | 0.1   | 0.59  | 319 (102) | 121 (35) |
| rs662799    | APOA5       | G | J.A.K.  | + | + | 8.8  | 8.1  | 12  | 1.4  | 0.11  | 0.65  | 117 (52)  | 5 (1)    |
| rs2072560   | APOA5       | T | J.A.K.  | + | + | 6.7  | 8.1  | 12  | 1.4  | 0.11  | 0.66  | 117 (52)  | 5 (1)    |
| rs651821    | APOA5       | C | J.A.K.  | + | + | 7.1  | 8.1  | 12  | 1.4  | 0.11  | 0.66  | 117 (52)  | 5 (1)    |
| rs314253    | DLG4        | C | C.J.W.  | - | - | 32   | 41   | 47  | 1.1  | 0.11  | 0.18  | 368 (136) | 112 (41) |
| rs4942486   | BRCA2       | T | C.J.W.  | + | + | 49   | 43   | 37  | 0.87 | 0.11  | 0.059 | 319 (102) | 98 (36)  |
| rs328       | LPL         | G | J.A.K.  | - | - | 10   | 8.8  | 5.6 | 0.63 | 0.12  | 0.052 | 89 (26)   | 2 (0)    |
| rs112875651 | TRIB1       | A | I.S.    | - | - | 38   | 39   | 34  | 0.86 | 0.13  | 0.5   | 304 (100) | 83 (27)  |
| rs2479409   | PCSK9       | G | T.M.T.  | + | + | 32   | 29   | 24  | 0.83 | 0.13  | 0.2   | 270 (91)  | 38 (11)  |
| rs646776    | CELSR2      | C | I.S.    | - | + | 22   | 21   | 18  | 0.82 | 0.14  | 0.88  | 212 (70)  | 23 (6)   |
| rs629301    | SORT1       | G | T.M.T.  | - | + | 22   | 22   | 18  | 0.81 | 0.14  | 0.86  | 206 (70)  | 29 (6)   |
| rs2266788   | APOA5       | G | J.A.K.  | + | + | 9.5  | 8.4  | 12  | 1.4  | 0.15  | 0.74  | 117 (52)  | 5 (1)    |
| rs6073958   | PLTP        | C | I.S.    | - | + | 22   | 18   | 22  | 1.2  | 0.15  | 0.15  | 211 (93)  | 17 (5)   |
| rs55714927  | DLG4        | T | I.S.    | - | - | 19   | 26   | 31  | 1.2  | 0.15  | 0.43  | 243 (86)  | 51 (19)  |

|             |          |   |        |   |   |     |     |     |      |      |       |           |          |
|-------------|----------|---|--------|---|---|-----|-----|-----|------|------|-------|-----------|----------|
| rs12678919  | LPL      | G | T.M.T. | - | - | 13  | 8.6 | 5.6 | 0.65 | 0.15 | 0.058 | 88 (26)   | 2 (0)    |
| rs1564348   | LPA      | C | T.M.T. | + | - | 17  | 14  | 18  | 1.3  | 0.16 | 0.85  | 193 (76)  | 18 (3)   |
| rs10889348  | DOCK7    | T | I.S.   | - | - | 32  | 27  | 22  | 0.84 | 0.16 | 0.92  | 237 (86)  | 33 (9)   |
| rs2073547   | NPC1L1   | G | C.J.W. | + | - | 17  | 34  | 38  | 1.1  | 0.17 | 0.16  | 303 (103) | 92 (38)  |
| rs7248104   | INSR     | A | C.J.W. | - | - | 44  | 44  | 39  | 0.89 | 0.17 | 0.66  | 336 (109) | 101 (37) |
| rs187429064 | TM6SF2   | G | I.S.   | - | - | 1.3 | 5.6 | 3.7 | 0.67 | 0.17 | 0.49  | 46 (15)   | 2 (0)    |
| rs2328223   | SNX5     | C | C.J.W. | + | + | 24  | 21  | 25  | 1.2  | 0.18 | 0.51  | 251 (86)  | 38 (16)  |
| rs2131925   | ANGPTL3  | G | T.M.T. | - | - | 32  | 26  | 22  | 0.85 | 0.18 | 0.77  | 240 (85)  | 30 (9)   |
| rs9988450   | DOCK7    | T | I.S.   | - | - | 32  | 26  | 22  | 0.85 | 0.18 | 0.79  | 240 (85)  | 30 (9)   |
| rs2710642   | EHBP1    | G | C.J.W. | - | + | 38  | 39  | 44  | 1.1  | 0.19 | 0.29  | 311 (96)  | 132 (55) |
| rs217386    | NPC1L1   | A | T.M.T. | - | + | 43  | 32  | 27  | 0.87 | 0.19 | 0.23  | 281 (102) | 56 (13)  |
| rs3850634   | ANGPTL3  | G | T.M.T. | - | - | 30  | 26  | 22  | 0.85 | 0.19 | 0.77  | 240 (85)  | 30 (9)   |
| rs11887534  | ABCG5/G8 | C | J.A.K. | - | - | 7.7 | 9.1 | 6.2 | 0.68 | 0.19 | 0.22  | 90 (29)   | 0 (0)    |
| rs114067101 | HLA-area | G | I.S.   | + | + | 5.8 | 3.3 | 5   | 1.5  | 0.2  | 0.83  | 13 (4)    | 0 (0)    |
| rs72875462  | ABCG8    | A | I.S.   | - | - | 6.4 | 9   | 6.2 | 0.69 | 0.2  | 0.23  | 89 (29)   | 0 (0)    |
| rs2920503   | PPARG    | T | I.S.   | + | + | 28  | 32  | 37  | 1.1  | 0.21 | 0.63  | 293 (104) | 64 (27)  |
| rs5882      | CETP     | G | J.A.K. | - | - | 32  | 38  | 42  | 1.1  | 0.22 | 0.16  | 329 (124) | 100 (36) |
| rs11136341  | PLEC1    | G | T.M.T. | + | + | 41  | 37  | 41  | 1.1  | 0.22 | 0.27  | 316 (112) | 107 (41) |
| rs1129555   | GPAM     | A | T.M.T. | + | - | 31  | 33  | 29  | 0.88 | 0.22 | 0.32  | 280 (105) | 57 (15)  |
| rs117492019 | ZNF274   | T | I.S.   | - | - | 20  | 16  | 13  | 0.82 | 0.22 | 0.022 | 146 (50)  | 13 (4)   |
| rs56130071  | DNAH11   | C | I.S.   | + | + | 19  | 21  | 24  | 1.2  | 0.23 | 0.62  | 231 (80)  | 39 (15)  |
| rs719726    | RSPO3    | C | C.J.W. | + | - | 48  | 44  | 40  | 0.9  | 0.23 | 0.43  | 297 (98)  | 124 (42) |
| rs12670798  | DNAH11   | C | T.M.T. | + | + | 22  | 24  | 28  | 1.2  | 0.24 | 0.66  | 260 (89)  | 47 (20)  |
| rs11164654  | EVI5     | T | I.S.   | - | - | 19  | 22  | 26  | 1.2  | 0.24 | 0.49  | 223 (75)  | 36 (22)  |
| rs38855     | MET      | G | C.J.W. | - | + | 48  | 46  | 42  | 0.91 | 0.24 | 0.79  | 305 (99)  | 148 (48) |
| rs3757354   | MYLIP    | T | T.M.T. | - | + | 20  | 26  | 29  | 1.1  | 0.25 | 0.13  | 265 (94)  | 50 (21)  |
| rs2030746   | LOC84931 | T | C.J.W. | + | - | 41  | 35  | 39  | 1.1  | 0.26 | 0.86  | 309 (108) | 92 (37)  |
| rs340839    | PROX1    | A | I.S.   | + | - | 50  | 38  | 42  | 1.1  | 0.26 | 0.14  | 330 (117) | 122 (40) |
| rs2230806   | ABCA1    | T | J.A.K. | + | - | 27  | 22  | 19  | 0.86 | 0.26 | 0.28  | 190 (77)  | 18 (6)   |

|             |         |   |        |   |   |     |      |      |      |      |        |           |          |
|-------------|---------|---|--------|---|---|-----|------|------|------|------|--------|-----------|----------|
| rs4299376   | ABCG5/8 | G | T.M.T. | + | + | 33  | 21   | 24   | 1.1  | 0.27 | 0.0094 | 235 (94)  | 27 (10)  |
| rs1495743   | NAT2    | G | T.M.T. | + | + | 24  | 25   | 22   | 0.88 | 0.27 | 0.12   | 257 (89)  | 33 (7)   |
| rs10761731  | JMJD1C  | T | T.M.T. | + | - | 45  | 38   | 34   | 0.9  | 0.28 | 0.18   | 321 (116) | 91 (22)  |
| rs77542162  | ABCA6   | G | I.S.   | + | - | 1.7 | 0.54 | 0.21 | 0.39 | 0.28 |        | 11 (1)    | 0 (0)    |
| rs138570705 | FRMD5   | A | I.S.   | - | - | 3.3 | 1.8  | 2.8  | 1.6  | 0.29 | 0.77   | 28 (13)   | 0 (0)    |
| rs2954029   | TRIB1   | T | T.M.T. | - | - | 45  | 46   | 43   | 0.92 | 0.29 | 0.64   | 327 (119) | 129 (40) |
| rs1121980   | FTO     | A | C.J.W. | + | + | 45  | 43   | 39   | 0.91 | 0.29 | 0.096  | 326 (107) | 87 (38)  |
| rs731839    | PEPD    | G | C.J.W. | - | + | 33  | 35   | 31   | 0.89 | 0.29 | 0.95   | 298 (103) | 64 (21)  |
| rs7759633   | LPA     | A | I.S.   | + | - | 14  | 9.3  | 12   | 1.3  | 0.3  | 0.74   | 130 (51)  | 7 (2)    |
| rs9638182   | MLXIPL  | G | I.S.   | + | - | 19  | 17   | 15   | 0.85 | 0.3  | 0.69   | 176 (50)  | 32 (9)   |
| rs186696265 | LPA     | T | I.S.   | + | - | 1.1 | 1.6  | 2.5  | 1.6  | 0.31 | 0.67   | 29 (7)    | 1 (0)    |
| rs3816873   | MTTP    | C | J.A.K. | - | + | 26  | 19   | 22   | 1.2  | 0.31 | 0.67   | 198 (79)  | 25 (12)  |
| rs4719841   | MIR148A | G | C.J.W. | - | - | 40  | 37   | 40   | 1.1  | 0.31 | 0.84   | 285 (97)  | 101 (45) |
| rs1358980   | VEGFA   | T | I.S.   | + | + | 49  | 47   | 50   | 1.1  | 0.32 | 0.052  | 348 (128) | 144 (53) |
| rs405509    | APOE    | T | J.A.K. | + | - | 50  | 45   | 42   | 0.93 | 0.32 | 0.53   | 326 (115) | 117 (38) |
| rs268       | LPL     | G | J.A.K. | + | + | 2   | 2.2  | 3.2  | 1.5  | 0.33 | 0.9    | 37 (15)   | 0 (0)    |
| rs4253776   | PPARA   | G | C.J.W. | + | + | 12  | 7.9  | 6    | 0.76 | 0.33 | 0.86   | 81 (28)   | 1 (0)    |
| rs3177928   | HLA     | A | T.M.T. | + | + | 16  | 21   | 24   | 1.1  | 0.34 | 0.84   | 240 (89)  | 31 (11)  |
| rs7811265   | MLXIPL  | G | T.M.T. | + | - | 19  | 17   | 15   | 0.86 | 0.34 | 0.73   | 175 (50)  | 33 (9)   |
| rs10195252  | COBLL1  | C | T.M.T. | - | - | 46  | 34   | 38   | 1.1  | 0.36 | 0.54   | 298 (122) | 80 (27)  |
| rs1553318   | TIMD4   | G | I.S.   | - | - | 36  | 32   | 35   | 1.1  | 0.36 | 0.38   | 291 (97)  | 86 (34)  |
| rs17585887  | CITED2  | T | I.S.   | + | + | 40  | 50   | 46   | 0.93 | 0.36 | 0.74   | 309 (121) | 169 (48) |
| rs8077889   | MPP3    | C | C.J.W. | + | + | 26  | 21   | 23   | 1.1  | 0.38 | 0.77   | 222 (80)  | 42 (14)  |
| rs645040    | MSL2L1  | G | T.M.T. | - | - | 25  | 14   | 12   | 0.84 | 0.38 | 0.052  | 146 (52)  | 7 (2)    |
| rs2954022   | TRIB1   | A | T.M.T. | - | - | 45  | 47   | 44   | 0.94 | 0.4  | 0.7    | 331 (123) | 134 (41) |
| rs909802    | TOP1    | C | T.M.T. | - | - | 55  | 46   | 43   | 0.94 | 0.41 | 0.65   | 349 (129) | 128 (36) |
| rs11613352  | LRP1    | T | T.M.T. | + | + | 20  | 23   | 25   | 1.1  | 0.42 | 0.35   | 231 (78)  | 39 (20)  |
| rs61352607  | LRP1    | T | I.S.   | + | + | 20  | 23   | 25   | 1.1  | 0.43 | 0.34   | 231 (78)  | 39 (20)  |

|             |             |   |        |   |   |      |      |      |      |      |       |           |          |
|-------------|-------------|---|--------|---|---|------|------|------|------|------|-------|-----------|----------|
| rs2068888   | CYP26A1     | A | T.M.T. | - | - | 49   | 47   | 49   | 1.1  | 0.47 | 0.84  | 318 (109) | 159 (61) |
| rs4722551   | MIR148A     | C | C.J.W. | + | - | 18   | 23   | 21   | 0.91 | 0.48 | 0.83  | 232 (71)  | 41 (13)  |
| rs11648003  | HPR         | G | I.S.   | + | + | 23   | 22   | 24   | 1.1  | 0.49 | 0.42  | 203 (83)  | 41 (15)  |
| rs5763662   | MTMR3       | T | C.J.W. | + | - | 2.4  | 3.1  | 2.4  | 0.75 | 0.49 | 0.12  | 30 (11)   | 1 (0)    |
| rs1800562   | HFE         | A | T.M.T. | - | - | 5.1  | 3.8  | 4.7  | 1.2  | 0.5  | 0.35  | 64 (22)   | 0 (0)    |
| rs12027135  | LDLRAP1     | A | T.M.T. | - | - | 47   | 46   | 49   | 1.1  | 0.5  | 0.23  | 328 (115) | 142 (56) |
| rs1367117   | APOB        | A | T.M.T. | + | + | 32   | 28   | 30   | 1.1  | 0.52 | 0.32  | 256 (95)  | 64 (22)  |
| rs1169314   | HNF1A       | G | I.S.   | + | + | 33   | 31   | 33   | 1.1  | 0.52 | 0.061 | 284 (104) | 59 (25)  |
| rs7205804   | CETP        | A | T.M.T. | - | - | 43   | 42   | 44   | 1.1  | 0.54 | 0.77  | 344 (120) | 124 (44) |
| rs3890182   | ABCA1       | A | J.A.K. | - | - | 12   | 11   | 9.4  | 0.89 | 0.55 | 0.23  | 114 (42)  | 5 (1)    |
| rs193042029 | TM4SF5      | G | I.S.   | - | - | 0.37 | 3    | 2.4  | 0.78 | 0.55 | 0.93  | 37 (11)   | 1 (0)    |
| rs2929282   | FRMD5       | T | T.M.T. | - | - | 5.1  | 4.9  | 6    | 1.2  | 0.56 | 0.78  | 54 (22)   | 5 (3)    |
| rs3843482   | HMGCR       | G | I.S.   | + | + | 38   | 44   | 42   | 0.95 | 0.56 | 0.24  | 342 (116) | 111 (37) |
| rs2943645   | IRS1        | C | T.M.T. | + | - | 37   | 37   | 39   | 1.1  | 0.57 | 0.55  | 297 (105) | 101 (38) |
| rs2332328   | NYNRIN      | T | T.M.T. | + | - | 51   | 38   | 40   | 1    | 0.6  | 0.24  | 316 (106) | 99 (40)  |
| rs267733    | ANXA9-CERS2 | G | C.J.W. | - | + | 15   | 14   | 13   | 0.9  | 0.6  | 0.66  | 155 (58)  | 12 (1)   |
| rs17404153  | ACAD11      | T | C.J.W. | - | + | 12   | 18   | 16   | 0.92 | 0.61 | 0.3   | 195 (66)  | 19 (5)   |
| rs1799816   | INSR        | T | J.A.K. | + | + | 0.93 | 0.64 | 0.43 | 0.67 | 0.61 |       | 4 (2)     | 0 (0)    |
| rs10822145  | JMJD1C      | T | I.S.   | + | - | 51   | 48   | 46   | 0.96 | 0.62 | 0.46  | 345 (131) | 151 (42) |
| rs2412710   | CAPN3       | A | T.M.T. | - | - | 3.5  | 0.26 | 0.43 | 1.7  | 0.63 | 0.38  | 5 (2)     | 0 (0)    |
| rs3780181   | VLDLR       | G | C.J.W. | - | + | 5.6  | 5.3  | 6    | 1.1  | 0.63 | 0.94  | 61 (24)   | 4 (2)    |
| rs59379014  | ST3GAL4     | T | C.J.W. | + | - | 6.3  | 8    | 7    | 0.88 | 0.63 | 0.55  | 88 (31)   | 1 (1)    |
| rs3198697   | PDXDC1      | T | C.J.W. | + | - | 42   | 41   | 42   | 1    | 0.64 | 0.28  | 308 (115) | 118 (38) |
| rs183130    | CETP        | T | J.A.K. | - | - | 30   | 28   | 29   | 1.1  | 0.65 | 0.36  | 274 (98)  | 58 (20)  |
| rs247616    | CETP        | T | T.M.T. | - | - | 30   | 28   | 29   | 1.1  | 0.65 | 0.36  | 274 (98)  | 58 (20)  |
| rs247617    | CETP        | A | I.S.   | - | - | 30   | 28   | 29   | 1.1  | 0.65 | 0.37  | 274 (98)  | 58 (20)  |
| rs821840    | CETP        | G | I.S.   | - | - | 29   | 28   | 29   | 1.1  | 0.65 | 0.37  | 274 (98)  | 58 (20)  |
| rs4530754   | CSNK1G3     | A | C.J.W. | + | - | 61   | 50   | 52   | 1    | 0.65 | 0.7   | 328 (122) | 181 (52) |
| rs4307732   | ST3GAL4     | A | I.S.   | + | - | 9.4  | 16   | 15   | 0.93 | 0.65 | 0.48  | 176 (56)  | 14 (7)   |

|             |             |   |                   |   |   |     |      |     |      |      |      |           |          |
|-------------|-------------|---|-------------------|---|---|-----|------|-----|------|------|------|-----------|----------|
| rs112374545 | LDLR        | T | I.S.              | - | - | 12  | 11   | 9.8 | 0.92 | 0.65 | 0.64 | 114 (42)  | 5 (2)    |
| rs6511720   | LDLR        | T | T.M.T.            | - | - | 11  | 11   | 9.8 | 0.92 | 0.65 | 0.64 | 115 (42)  | 5 (2)    |
| rs6882076   | TIMD4       | T | T.M.T.            | - | - | 36  | 33   | 34  | 1    | 0.66 | 0.35 | 287 (95)  | 86 (33)  |
| rs5756931   | PLA2G6      | C | T.M.T.            | - | - | 41  | 39   | 38  | 0.96 | 0.66 | 0.46 | 327 (112) | 76 (32)  |
| rs4665710   | APOB        | A | I.S.              | - | - | 22  | 26   | 27  | 1    | 0.69 | 0.98 | 271 (96)  | 32 (16)  |
| rs419132    | HLA-area    | G | I.S.              | + | + | 30  | 16   | 15  | 0.94 | 0.69 | 0.55 | 174 (61)  | 16 (5)   |
| rs2000999   | HPR         | A | T.M.T.            | + | + | 19  | 19   | 21  | 1.1  | 0.7  | 0.38 | 194 (72)  | 27 (12)  |
| rs58542926  | TM6SF2      | T | I.S.              | - | - | 8.1 | 5.9  | 5.3 | 0.9  | 0.7  | 0.28 | 62 (25)   | 3 (0)    |
| rs1042034   | APOB        | C | T.M.T.            | - | - | 21  | 26   | 27  | 1    | 0.71 | 0.96 | 273 (96)  | 33 (16)  |
| rs79588679  | GATA6       | T | I.S.              | - | + | 16  | 17   | 16  | 0.94 | 0.71 | 0.54 | 174 (69)  | 14 (3)   |
| rs34894639  | MSL2L1,PCCB | T | I.S.              | - | - | 26  | 19   | 18  | 0.94 | 0.71 | 0.37 | 170 (61)  | 14 (6)   |
| rs11591147  | PCSK9       | T | C.J.W.,<br>J.A.K. | - | - | 3.5 | 4    | 3.4 | 0.86 | 0.71 | 0.93 | 49 (14)   | 1 (1)    |
| rs174551    | FADS1       | C | I.S.              | - | + | 32  | 40   | 39  | 0.97 | 0.72 | 0.62 | 296 (96)  | 97 (36)  |
| rs2540948   | CEP68       | C | I.S.              | + | - | 37  | 32   | 31  | 0.97 | 0.73 | 0.99 | 292 (107) | 66 (18)  |
| rs10401969  | CILP2       | C | T.M.T.            | - | - | 7.3 | 5.8  | 5.3 | 0.91 | 0.73 | 0.26 | 61 (25)   | 4 (0)    |
| rs1801689   | APOH-PRXCA  | C | C.J.W.            | + | - | 3.3 | 0.85 | 1.1 | 1.3  | 0.74 | 0.83 | 16 (5)    | 0 (0)    |
| rs649129    | ABO         | T | T.M.T.            | + | - | 22  | 20   | 19  | 0.96 | 0.74 | 0.92 | 132 (45)  | 13 (6)   |
| rs73001065  | CILP2       | C | I.S.              | - | - | 6.4 | 5.8  | 5.3 | 0.92 | 0.74 | 0.27 | 61 (25)   | 3 (0)    |
| rs12310367  | ZNF664      | G | T.M.T.            | - | - | 38  | 28   | 29  | 1    | 0.75 | 0.27 | 268 (92)  | 56 (21)  |
| rs140244541 | FAM117B     | A | I.S.              | - | - | 16  | 13   | 12  | 0.94 | 0.75 | 0.86 | 129 (49)  | 10 (4)   |
| rs11776767  | PINX1       | C | T.M.T.            | - | - | 41  | 31   | 30  | 0.97 | 0.76 | 0.74 | 286 (99)  | 61 (20)  |
| rs3902941   | MAFB        | G | T.M.T.            | - | - | 31  | 26   | 25  | 0.97 | 0.77 | 0.82 | 267 (93)  | 35 (12)  |
| rs550057    | ABO         | T | I.S.              | + | + | 28  | 31   | 30  | 0.97 | 0.78 | 0.94 | 269 (96)  | 53 (22)  |
| rs11220462  | ST3GAL4     | A | T.M.T.            | + | + | 12  | 19   | 18  | 0.96 | 0.78 | 0.28 | 211 (70)  | 15 (8)   |
| rs9297994   | CYP7A1      | G | I.S.              | + | + | 36  | 38   | 39  | 1    | 0.79 | 0.93 | 294 (104) | 104 (39) |
| rs1169288   | HNF1A       | C | J.A.K.,<br>T.M.T. | + | + | 35  | 39   | 40  | 1    | 0.8  | 0.09 | 317 (119) | 84 (34)  |
| rs586178    | LDLRAP1     | C | I.S.              | + | + | 45  | 47   | 46  | 0.98 | 0.8  | 0.58 | 265 (87)  | 125 (46) |
| rs12916     | HMGCR       | C | T.M.T.            | + | + | 40  | 46   | 45  | 0.98 | 0.8  | 0.29 | 353 (122) | 122 (44) |

|            |           |   |        |   |   |      |      |      |      |      |      |           |          |
|------------|-----------|---|--------|---|---|------|------|------|------|------|------|-----------|----------|
| rs2297374  | LPA       | T | C.J.W. | - | - | 40   | 34   | 33   | 0.98 | 0.8  | 0.66 | 302 (93)  | 89 (30)  |
| rs2255811  | GPR85     | G | I.S.   | - | + | 28   | 24   | 23   | 0.97 | 0.8  | 0.71 | 211 (78)  | 32 (14)  |
| rs1250229  | FN1       | T | C.J.W. | - | - | 25   | 20   | 21   | 1    | 0.81 | 0.35 | 243 (82)  | 23 (7)   |
| rs174583   | FADS1-2-3 | T | T.M.T. | - | + | 34   | 42   | 41   | 0.98 | 0.82 | 0.69 | 314 (98)  | 111 (47) |
| rs1030431  | CYP7A1    | A | T.M.T. | + | + | 35   | 31   | 30   | 0.98 | 0.82 | 0.45 | 266 (89)  | 62 (24)  |
| rs364585   | SPTLC3    | A | C.J.W. | - | + | 37   | 34   | 33   | 0.98 | 0.83 | 0.58 | 315 (110) | 64 (23)  |
| rs442177   | KLHL8     | G | T.M.T. | - | - | 40   | 48   | 49   | 1    | 0.84 | 0.56 | 332 (114) | 157 (57) |
| rs1077835  | LIPC      | G | I.S.   | + | + | 22   | 27   | 27   | 1    | 0.85 | 0.72 | 257 (95)  | 44 (16)  |
| rs514230   | IRF2BP2   | A | T.M.T. | - | - | 49   | 43   | 44   | 1    | 0.87 | 0.61 | 326 (115) | 147 (45) |
| rs174529   | FADS1     | C | I.S.   | - | + | 36   | 42   | 43   | 1    | 0.89 | 0.61 | 317 (100) | 117 (50) |
| rs1321257  | GALNT2    | G | T.M.T. | + | + | 39   | 43   | 43   | 0.99 | 0.89 | 0.51 | 329 (117) | 132 (42) |
| rs769452   | APOE      | C | J.A.K. | + | + | 0.36 | 0.58 | 0.64 | 1.1  | 0.9  | 0.46 | 6 (3)     | 0 (0)    |
| rs2618568  | SNX5      | C | I.S.   | + | + | 44   | 37   | 38   | 1    | 0.9  | 0.15 | 319 (113) | 88 (32)  |
| rs9686661  | MAP3K1    | T | T.M.T. | + | + | 20   | 14   | 15   | 1    | 0.91 | 0.18 | 150 (57)  | 8 (6)    |
| rs10864728 | GALNT2    | A | I.S.   | + | + | 39   | 43   | 43   | 0.99 | 0.91 | 0.48 | 326 (116) | 129 (42) |
| rs2807834  | MOSC1     | T | T.M.T. | - | - | 30   | 29   | 29   | 1    | 0.92 | 0.86 | 276 (91)  | 69 (23)  |
| rs8023503  | LIPC      | T | J.A.K. | - | + | 1.4  | 2    | 1.9  | 0.95 | 0.92 | 0.89 | 22 (8)    | 0 (0)    |
| rs11153594 | FRK       | T | T.M.T. | - | - | 41   | 40   | 41   | 1    | 0.94 | 0.47 | 319 (121) | 108 (34) |
| rs1832007  | AKR1C4    | G | C.J.W. | - | - | 12   | 13   | 13   | 1    | 0.95 | 0.47 | 142 (47)  | 17 (7)   |
| rs261342   | LIPC      | G | T.M.T. | + | + | 22   | 23   | 23   | 0.99 | 0.96 | 0.83 | 222 (80)  | 39 (13)  |
| rs10490626 | INSIG2    | A | C.J.W. | - | - | 8.2  | 6.7  | 6.6  | 0.99 | 0.96 | 0.8  | 78 (27)   | 3 (2)    |
| rs11065987 | BRAP      | G | T.M.T. | - | + | 44   | 38   | 38   | 1    | 0.97 | 0.71 | 299 (106) | 94 (35)  |
| rs2035403  | KLHL8     | G | I.S.   | + | + | 38   | 40   | 40   | 1    | 0.98 | 0.94 | 318 (110) | 108 (37) |
| rs11621792 | NYNRIN    | T | I.S.   | + | - | 49   | 36   | 36   | 1    | 0.98 | 0.22 | 267 (91)  | 79 (33)  |
| rs12594375 | LIPC      | A | J.A.K. | - | + | 1.2  | 1.9  | 1.9  | 1    | 0.99 | 0.91 | 25 (9)    | 0 (0)    |
| rs2247056  | HLA       | T | T.M.T. | - | - | 21   | 23   | 23   | 1    | 0.99 | 0.59 | 239 (71)  | 41 (19)  |
| rs174546   | FADS1-2-3 | T | T.M.T. | - | + | 32   | 42   | 42   | 1    | 0.99 | 0.54 | 317 (99)  | 113 (48) |
