# Supplementary material for: The Contribution of GWAS Loci in Familial Dyslipidemias
Source: PubMed Central journal article supplement (PMC4882070; doi:10.1371/journal.pgen.1006078), 2016-05-26
Supplement: pgen.1006078.s010.pdf [file pgen.1006078.s010.pdf]

| <b>Age (years)</b> | <b><u>Total cholesterol</u></b> |                | <b><u>Triglycerides</u></b> |                |
|--------------------|---------------------------------|----------------|-----------------------------|----------------|
|                    | <b>Males</b>                    | <b>Females</b> | <b>Males</b>                | <b>Females</b> |
| -30                | 6.2                             | 6.1            | 2.4                         | 1.6            |
| 30-35              | 6.6                             | 6.2            | 2.7                         | 1.7            |
| 35-40              | 7.0                             | 6.4            | 2.9                         | 1.8            |
| 40-45              | 7.2                             | 6.6            | 3.2                         | 1.9            |
| 45-50              | 7.4                             | 6.8            | 3.4                         | 2.0            |
| 50-55              | 7.5                             | 7.1            | 3.5                         | 2.1            |
| 55-60              | 7.5                             | 7.3            | 3.5                         | 2.3            |
| 60-                | 7.4                             | 7.6            | 3.5                         | 2.5            |
